# Supplementary material for: Effects of Raster Angle on the Elasticity of 3D-Printed Polylactic Acid and Polyethylene Terephthalate Glycol
Source: MDPI journal article supplement (doi:10.3390/designs7050112), 2023-09-29
Supplement: s1 [file s1]

# Effects of Raster Angle on the Elasticity of 3D-Printed Polylactic Acid and Polyethylene Terephthalate Glycol

Mohammed Aqeel Albadrani

Department of Mechanical Engineering, College of Engineering, Qassim University,  
Unaizah 56452, Saudi Arabia; moa.albadrani@qu.edu.sa

The steps of using subroutines in ANSYS Autodyn are as follows:

**Step 1:** Within Autodyn, select Options > Create User-Subroutine Project and select the location where the subroutine folder is to be created;

**Step 2:** Go to this folder location and open ad\_usrsub.sln with Visual Studio 2017;

**Step 3:** Locate the file to be edited within the fsr folder;

**Step 4:** Build the solution and the code compiles.

Figure S1 shows the steps of using subroutines in ANSYS.

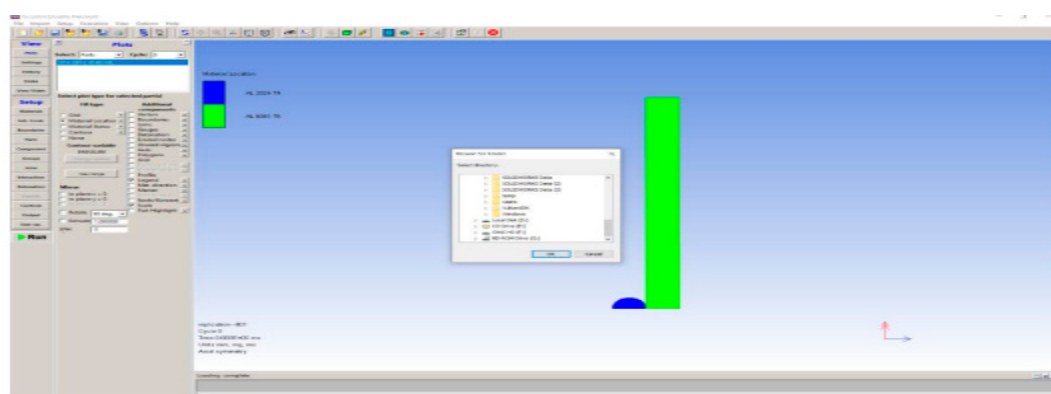

(a)

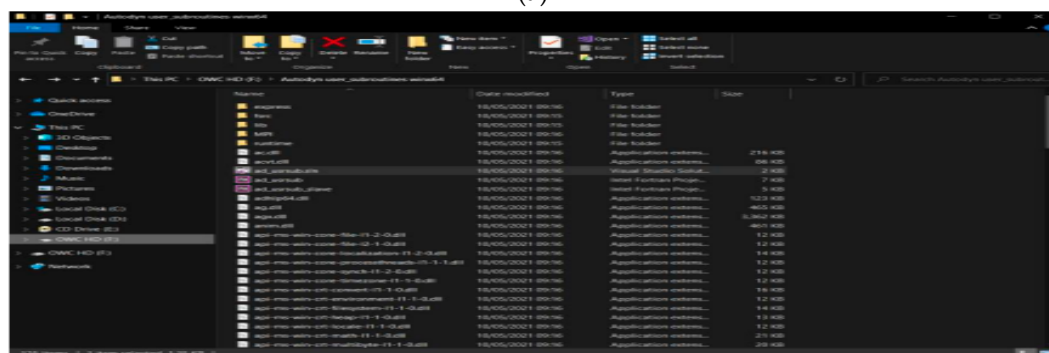

(b)

**Figure S1.** The steps of using subroutines in ANSYS.
